# Supplementary material for: Forensic genetics and genomics: Much more than just a human affair
Source: PubMed Central journal article supplement (PMC5608170; doi:10.1371/journal.pgen.1006960), 2017-09-21
Supplement: pgen.1006960.s001.pdf [file pgen.1006960.s001.pdf]

| <b>Application</b>                     | <b>Type of source</b> | <b>Organism or material (additional information)</b>                               | <b>Reference</b> |
|----------------------------------------|-----------------------|------------------------------------------------------------------------------------|------------------|
| Associative evidence in criminalistics | Animals               | Cat (implication of murder suspect)                                                | [1, 2]           |
| Associative evidence in criminalistics | Plants                | Oak (evidence in criminal case)                                                    | [3]              |
|                                        |                       | Knotgrass (evidence in criminal case)                                              | [4]              |
|                                        |                       | Mosses (evidence in criminal case)                                                 | [5]              |
|                                        |                       | Soil and plants (selection between alternative paths)                              | [6]              |
|                                        |                       | <i>Amanita phalloides</i> and yew (poisoning)                                      | [7, 8]           |
| Post-mortem interval                   |                       | Bryophytes and plant roots (identification of post-mortem time interval)           | [9]              |
| Post-mortem interval                   | Insects               | Calliphoridae (identification of post-mortem time interval)                        | [10]             |
| Associative evidence in criminalistics | Bacteria              | Skin bacterial communities (identification of individual)                          | [11, 12]         |
|                                        |                       | Salivary bacterial communities (identification of individual)                      | [13]             |
|                                        |                       | Gut bacterial communities (identification of individual)                           | [14]             |
|                                        |                       | <i>Staphylococcus aureus</i> and <i>Clostridium difficile</i> (outbreak detection) | [15, 16]         |
|                                        |                       | <i>Bacillus anthracis</i> (bioterrorism)                                           | [17-19]          |
|                                        |                       | Profiles of footwear insoles (forensic discrimination)                             | [20]             |
| Associative evidence in criminalistics | Virus                 | Hepatitis C (identification of virus outbreak)                                     | [21, 22]         |
|                                        |                       | HIV-1 (source identification in criminal cases)                                    | [23, 24]         |
|                                        |                       | HIV-1 (deliberated transmission)                                                   | [25-33]          |

HIV-1 (lack of transmission [34]  
from the suspect)

---

Associative evidence Admixture Soil DNA (evidence in [35]  
in criminalistics murder case)

---
