# Supplementary material for: Forensic genetics and genomics: Much more than just a human affair
Source: PubMed Central journal article supplement (PMC5608170; doi:10.1371/journal.pgen.1006960), 2017-09-21
Supplement: pgen.1006960.s002.pdf [file pgen.1006960.s002.pdf]

| <b>Type of case</b>                             | <b>Application</b>              | <b>Organism or material<br/>(additional information)</b> | <b>Reference</b>                         |      |
|-------------------------------------------------|---------------------------------|----------------------------------------------------------|------------------------------------------|------|
| Individualization/<br>kinship                   | Death/bodily/material<br>harm   | Bear (attack)                                            | [36]                                     |      |
|                                                 |                                 | Dog (attack)                                             | [37, 38]                                 |      |
|                                                 |                                 | Dog (traffic accident)                                   | [39]                                     |      |
|                                                 |                                 | Bird (aircraft collision)                                | [40]                                     |      |
|                                                 | Identification                  | Horse (race doping<br>control)                           | [41]                                     |      |
|                                                 |                                 | Kinship/Pedigree<br>certification                        | Cattle (paternity)                       | [42] |
|                                                 | Horse (paternity)               |                                                          | [43]                                     |      |
|                                                 | Dog (paternity and<br>pedigree) |                                                          | [44-46]                                  |      |
|                                                 | Pigeon (paternity)              |                                                          | [47]                                     |      |
|                                                 | Taxonomic/species<br>assignment | Wildlife/protected<br>species                            | Smuggled eggs<br>(identification)        | [48] |
| Big cats (identification)                       |                                 |                                                          | [49]                                     |      |
| Deer (identification)                           |                                 |                                                          | [50]                                     |      |
| Tiger (poaching)                                |                                 |                                                          | [51]                                     |      |
| Mouflon (poaching)                              |                                 |                                                          | [52, 53]                                 |      |
| Bear (poaching)                                 |                                 |                                                          | [54]                                     |      |
| Coniferous trees (illegal<br>logging)           |                                 |                                                          | [55]                                     |      |
| Palm (illegal trading)                          |                                 |                                                          | [56]                                     |      |
| Identification of<br>totally unknown<br>species |                                 |                                                          | Stomach contents (suicidal<br>poisoning) | [8]  |
|                                                 |                                 |                                                          | Unknown animal (bite<br>through a tent)  | [57] |
|                                                 |                                 | Unknown livestock<br>predators                           | [58, 59]                                 |      |
| Food and drug<br>analyses                       |                                 | Dairy products<br>(authentication)                       | [60-63]                                  |      |
|                                                 |                                 | Caviar (mislabeling)                                     | [64, 65]                                 |      |
|                                                 |                                 | Meat products (detection)                                | [66, 67]                                 |      |

|                                            |                                |                                                                        |          |
|--------------------------------------------|--------------------------------|------------------------------------------------------------------------|----------|
|                                            |                                | of species origin)                                                     |          |
|                                            |                                | Meat (detection of religiously forbidden species)                      | [68]     |
|                                            |                                | Fish and seafood products (detection of species origin)                | [69, 70] |
|                                            |                                | Olive oils (authentication)                                            | [71-73]  |
|                                            |                                | Honey (authentication)                                                 | [74]     |
|                                            |                                | Herbal teas (authentication)                                           | [75, 76] |
|                                            |                                | Coffee (authentication)                                                | [77]     |
|                                            |                                | Drugs (legality and safety of traditional medicines)                   | [78, 79] |
|                                            |                                | Food traceability (food safety and identification of commercial fraud) | [80-85]  |
|                                            | Drug enforcement               | Cannabis (identification)                                              | [86, 87] |
| Population/breed/strain/variety assignment | Patent violation               | Strawberry varieties (identification)                                  | [88]     |
|                                            | Livestock robbery              | Cattle rustling (identification)                                       | [89]     |
|                                            |                                | Cattle (illegal purchase of stolen animals)                            | [90]     |
|                                            | Fishing, competition and fraud | Salmon populations                                                     | [91]     |
|                                            |                                | Commercial marine fish (false eco-certification)                       | [92]     |
|                                            |                                | Koi carp (illegal fishing)                                             | [93]     |
|                                            | Ivory source                   | Ivory (identification)                                                 | [94-96]  |
|                                            | Breeds identification          | Horses                                                                 | [43]     |
|                                            |                                | Sheep                                                                  | [97]     |
|                                            |                                | Beef cattle                                                            | [98]     |
|                                            |                                | Pigs                                                                   | [99]     |
|                                            |                                | Dogs                                                                   | [100]    |
|                                            | Authenticity                   | Grapevine varieties                                                    | [101]    |

|                                                   |                                                              |               |       |
|---------------------------------------------------|--------------------------------------------------------------|---------------|-------|
|                                                   |                                                              | Wine          | [102] |
| Geographic assignment                             | Dust analysis                                                | Fungi         | [103] |
|                                                   | Identification of geographic variants                        | Blow fly      | [104] |
|                                                   | Identification of geographic variants.<br>Global biosecurity | Insects       | [105] |
| Detection of genetically modified organisms (GMO) | GMO identification                                           | Food products | [106] |
